# Supplementary material for: Predictors of Progression and Mortality in Patients with Prevalent Rheumatoid Arthritis and Interstitial Lung Disease: A Prospective Cohort Study
Source: PubMed Central journal article supplement (PMC7924396; doi:10.3390/jcm10040874), 2021-02-20
Supplement: jcm-10-00874-s001.pdf [file jcm-10-00874-s001.pdf]

Supplementary Table S1. Previous treatment in patients with RA-ILD.

| Variable                         | Sample = 116 |
|----------------------------------|--------------|
| Synthetic DMARD                  |              |
| Methotrexate, <i>n</i> (%)       | 63 (54.3)    |
| Leflunomide, <i>n</i> (%)        | 40 (34.5)    |
| Sulfasalazine, <i>n</i> (%)      | 26 (22.4)    |
| Hydroxychloroquine, <i>n</i> (%) | 27 (23.3)    |
| Biologic DMARD                   |              |
| Infliximab, <i>n</i> (%)         | 6 (5.2)      |
| Etanercept, <i>n</i> (%)         | 6 (5.2)      |
| Adalimumab, <i>n</i> (%)         | 6 (5.2)      |
| Golimumab, <i>n</i> (%)          | 1 (1.9)      |
| Certolizumab, <i>n</i> (%)       | 2 (1.7)      |
| Tocilizumab, <i>n</i> (%)        | 6 (5.2)      |
| Abatacept, <i>n</i> (%)          | 3 (2.6)      |
| Rituximab, <i>n</i> (%)          | 4 (3.4)      |
| Immunosuppressants               |              |
| Mycophenolate, <i>n</i> (%)      | 2 (1.7)      |
| Azathioprine, <i>n</i> (%)       | 4 (3.4)      |
| Cyclophosphamide, <i>n</i> (%)   | 8 (6.9)      |

Abbreviations. RA: rheumatoid arthritis; ILD: interstitial lung disease; DMARD: disease-modifying antirheumatic drug.

Supplementary Table S2. Summary statistics for all continuous variables in 116 patients with RA-ILD.

| Variable                            | Mean  | SD    | Min  | Max   | P25  | P50   | P75   |
|-------------------------------------|-------|-------|------|-------|------|-------|-------|
| Age, years                          | 68.3  | 9.9   | 42.1 | 87.1  | 62.3 | 70.0  | 75.3  |
| Body mass index                     | 27.8  | 4.1   | 19.2 | 40.8  | 25.2 | 27.9  | 30.0  |
| Time since diagnosis of RA, months  | 170.8 | 120.1 | 4.2  | 400.3 | 71.5 | 148.5 | 217.8 |
| Diagnostic delay, months            | 14.8  | 16.8  | 0.0  | 60.1  | 4.9  | 8.5   | 16.8  |
| Time since diagnosis of ILD, months | 36.4  | 30.7  | 0.0  | 126.0 | 9.8  | 27.5  | 60.0  |
| FVC, baseline                       | 74.3  | 17.3  | 33   | 121   | 62.0 | 74.0  | 88.0  |
| FEV1, baseline                      | 80.9  | 20.5  | 40   | 192   | 65.0 | 78.5  | 94.0  |
| DLCO-SB, baseline                   | 61.2  | 16.2  | 23   | 99    | 48.5 | 59.5  | 69.0  |
| FVC, end of follow-up               | 69.8  | 23.4  | 31   | 132   | 55.5 | 70.0  | 87.5  |
| FEV1, end of follow-up              | 74.0  | 21.1  | 35   | 124   | 58.0 | 76.0  | 91.0  |
| DLCO-SB, end of follow-up           | 56.8  | 18.5  | 18   | 116   | 43.0 | 56.0  | 70.5  |
| DAS28, baseline                     | 3.2   | 1.2   | 0.9  | 7.0   | 2.3  | 2.8   | 4.0   |
| DAS28, end of follow-up             | 3.7   | 1.5   | 0.7  | 6.0   | 2.9  | 3.0   | 5.2   |
| HAQ, baseline                       | 1.0   | 1.1   | 0.0  | 3.0   | 0.2  | 1.0   | 1.8   |
| DAS28, end of follow-up             | 1.2   | 0.8   | 0.0  | 3.0   | 0.6  | 1.1   | 1.9   |

Abbreviations. RA: rheumatoid arthritis; ILD: interstitial lung disease; SD: standard deviation; FVC: forced vital capacity; FEV1: forced expiratory volume in the first second; DLCO: diffusing capacity of the lung for carbon monoxide.

Supplementary Table S3. Comparison of patients with RA-ILD according to bDMARD (anti-TNF or non-anti-TNF) at the beginning of the observation period.

| Variable                                       | Anti-TNF <i>n</i> = 16 | Non-anti-TNF <i>n</i> = 34 | <i>p</i> -Value |
|------------------------------------------------|------------------------|----------------------------|-----------------|
| Epidemiological characteristics                |                        |                            |                 |
| Female sex, <i>n</i> (%)                       | 14 (87.5)              | 15 (44.1)                  | 0.010           |
| Caucasian race, <i>n</i> (%)                   | 16 (100.0)             | 33 (97.1)                  | 0.488           |
| Age, years, mean (SD)                          | 67.6 (12.4)            | 65.6 (10.0)                | 0.544           |
| Clinical and analytical characteristics        |                        |                            |                 |
| Current smoker                                 |                        |                            | 0.867           |
| Nonsmoker, <i>n</i> (%)                        | 9 (56.3)               | 17 (50.0)                  |                 |
| Smoker, <i>n</i> (%)                           | 3 (18.8)               | 6 (17.6)                   |                 |
| Exsmoker, <i>n</i> (%)                         | 4 (25.0)               | 11 (32.4)                  |                 |
| Body mass index, mean (SD)                     | 29.3 (4.2)             | 27.4 (4.2)                 | 0.211           |
| Time since diagnosis of RA, months, mean (SD)  | 250.6 (125.6)          | 182.8 (117.2)              | 0.060           |
| Diagnostic delay, months, mean (SD)            | 20.7 (18.6)            | 19.9 (16.4)                | 0.898           |
| Time since diagnosis of ILD, months, mean (SD) | 55.0 (35.9)            | 41.1 (32.6)                | 0.182           |
| Positive rheumatoid factor (>10), <i>n</i> (%) | 16 (100)               | 33 (97.1)                  | 0.488           |
| Positive ACPA titer (>20), <i>n</i> (%)        | 15 (93.8)              | 32 (94.1)                  | 0.959           |
| Erosive disease, <i>n</i> (%)                  | 12 (75.0)              | 25 (73.5)                  | 0.912           |
| Synthetic DMARD                                | 14 (87.5)              | 24 (70.6)                  | 0.192           |
| Corticosteroids at baseline, <i>n</i> (%)      | 10 (62.5)              | 21 (61.8)                  | 0.960           |
| DAS28, mean (SD)                               | 3.1 (1.4)              | 3.2 (1.2)                  | 0.754           |
| HAQ, mean (SD)                                 | 0.9 (0.7)              | 1.3 (0.8)                  | 0.157           |
| Radiological pattern                           |                        |                            |                 |
| UIP, <i>n</i> (%)                              | 9 (56.3)               | 20 (58.8)                  | 0.863           |
| NSIP, <i>n</i> (%)                             | 7 (43.8)               | 14 (41.2)                  | 0.863           |
| Respiratory function                           |                        |                            |                 |
| FVC, mean (SD)                                 | 72.7 (15.5)            | 80.0 (16.7)                | 0.185           |
| FEV1, mean (SD)                                | 89.6 (33.2)            | 82.9 (16.5)                | 0.389           |
| DLCO-SB, mean (SD)                             | 58.0 (6.3)             | 64.6 (15.0)                | 0.180           |

|                                         |          |           |       |
|-----------------------------------------|----------|-----------|-------|
| Progression of lung disease (total)*    |          |           | 0.033 |
| Improvement/Stabilization, <i>n</i> (%) | 7 (43.8) | 24 (70.6) |       |
| Worsening/Death, <i>n</i> (%)           | 9 (56.3) | 10 (29.4) |       |

Abbreviations. RA: rheumatoid arthritis; ILD: interstitial lung disease; DMARD: disease-modifying antirheumatic drug; SD: standard deviation; FVC: forced vital capacity; FEV<sub>1</sub>: forced expiratory volume in the first second; DLCO-SB: diffusing capacity of the lung for carbon monoxide (single breath); UIP: usual interstitial pneumonia; NSIP: nonspecific interstitial pneumonia.

Supplementary Table S4. Characteristics of patients with RA-ILD taking DMARDs who died.

| Patient    | Follow-up (months) | Treatment                                  | Duration of Treatment (Months) | Cause of Death                                    |
|------------|--------------------|--------------------------------------------|--------------------------------|---------------------------------------------------|
| Patient 1  | 62.5               | Leflunomide                                | 108.5                          | COVID-19                                          |
| Patient 2  | 34.3               | Methotrexate                               | 179.3                          | Pulmonary adenocarcinoma                          |
| Patient 3  | 34.0               | Rituximab                                  | 71.7                           | Progression of ILD and pulmonary superinfection   |
| Patient 4  | 15.0               | Etanercept and hydroxychloroquine          | 25.0                           | Progression of ILD and pulmonary superinfection   |
| Patient 5  | 57.1               | Rituximab and hydroxychloroquine           | 74.0                           | Progression of ILD                                |
| Patient 6  | 25.7               | Infliximab and leflunomide                 | 146.2                          | Progression of ILD                                |
| Patient 7  | 27.7               | Etanercept                                 | 160.3                          | Progression of ILD and respiratory superinfection |
| Patient 8  | 46.8               | Methotrexate and hydroxychloroquine        | 63.3                           | Progression of ILD and respiratory superinfection |
| Patient 9  | 48.3               | Sulfasalazine                              | 48.3                           | Progression of ILD and respiratory superinfection |
| Patient 10 | 52.6               | Tocilizumab and methotrexate               | 64.1                           | Brain hemorrhage                                  |
| Patient 11 | 55.9               | Etanercept                                 | 60.1                           | Progression of ILD and respiratory superinfection |
| Patient 12 | 15.9               | Nintedanib and leflunomide                 | 10.5                           | Progression of ILD and respiratory superinfection |
| Patient 13 | 30.2               | Methotrexate                               | 99.8                           | Primary cerebral lymphoma                         |
| Patient 14 | 25.6               | Sulfasalazine                              | 33.3                           | Progression of ILD and respiratory superinfection |
| Patient 15 | 54.6               | Hydroxychloroquine and mycophenolate       | 84.1                           | Respiratory and urinary sepsis                    |
| Patient 16 | 49.9               | Methotrexate followed by leflunomide       | 24 followed by 22              | Progression of ILD                                |
| Patient 17 | 14.1               | Cyclophosphamide followed by mycophenolate | 36                             | Progression of ILD                                |
| Patient 18 | 47.2               | Adalimumab                                 | 120.5                          | Progression of ILD                                |

Abbreviations. RA: rheumatoid arthritis; ILD: interstitial lung disease.
